# Supplementary material for: Dynamic Simulation and Metabolome Analysis of Long-Term Erythrocyte Storage in Adenine–Guanosine Solution
Source: PubMed Central journal article supplement (PMC3796775; doi:10.1371/journal.pone.0071060), 2013-08-16
Supplement: pone.0071060.s008.pdf [file pone.0071060.s008.pdf]

|                                   | Base model (37 °C)                                                                                                                             | MAP model (4 °C)                                                        | PAGGGM model (4 °C)                                                                                          |
|-----------------------------------|------------------------------------------------------------------------------------------------------------------------------------------------|-------------------------------------------------------------------------|--------------------------------------------------------------------------------------------------------------|
| Enzymatic activities              | 100%                                                                                                                                           | 24%                                                                     | 25%                                                                                                          |
| Purine metabolism activities      | 100%                                                                                                                                           | 34%                                                                     | 30%                                                                                                          |
| Sodium/potassium pump activity    | 100%                                                                                                                                           | 6.0%                                                                    | 1.0%                                                                                                         |
| Extracellular glucose             | 5 mM (fixed)                                                                                                                                   | 40 mM                                                                   | 47.5 mM                                                                                                      |
| Extracellular adenine             | 0.015 mM (fixed)                                                                                                                               | 1.04 mM                                                                 | 1.44 mM                                                                                                      |
| Extracellular inorganic phosphate | 1.1 mM (fixed)                                                                                                                                 | 6 mM                                                                    | 16 mM                                                                                                        |
| Extracellular sodium ion          | 135 mM (fixed)                                                                                                                                 | 106 mM                                                                  | 64 mM                                                                                                        |
| Extracellular guanosine           | -                                                                                                                                              | -                                                                       | 1.44 mM                                                                                                      |
| Guanosine phosphorylation         | -                                                                                                                                              | -                                                                       | First-order kinetics                                                                                         |
| pH setting                        | pH = 7.2 (fixed)                                                                                                                               | Initial pH = 6.95,<br>pH(t) = $at + 6.95$<br>$a = -8.66 \times 10^{-8}$ | Initial pH = 7.62,<br>pH(t) = $at^2 + bt + 7.62$<br>$a = 8.79 \times 10^{-14}$<br>$b = -6.01 \times 10^{-7}$ |
| State of hemoglobin               | Transition between T- and R-state<br>in response to various parameters;<br>pO <sub>2</sub> , pCO <sub>2</sub> , pH, temperature and<br>2,3-BPG | R-state                                                                 | R-state                                                                                                      |
