# Supplementary material for: Dynamic Simulation and Metabolome Analysis of Long-Term Erythrocyte Storage in Adenine–Guanosine Solution
Source: PubMed Central journal article supplement (PMC3796775; doi:10.1371/journal.pone.0071060), 2013-08-16
Supplement: pone.0071060.s009.pdf [file pone.0071060.s009.pdf]

## 1. Detailed description of PAGGM-stored RBC model.

The main body of the model is based on the published human erythrocyte metabolic model [1]. All reactions expressed in the model are shown below:

### 1-1. Kinetic equation and parameters used in the model

Abbreviation of all reactions and reactants are corresponding to those shown in Table 1 in the main text.  $e_t$  denotes enzyme concentration.

**HK**

$$v = \frac{e_t \left( \frac{theK_{catf} AB}{K_{i,B} K_{m,A}} - \frac{theK_{catr} PQ}{K_{i,Q} K_{m,P}} \right)}{1 + \frac{A}{K_{i,A}} + \frac{B}{K_{i,B}} + \frac{AB}{K_{i,B} K_{m,A}} + \frac{P}{K_{i,P}} + \frac{Q}{K_{i,Q}} + \frac{PQ}{K_{i,Q} K_{m,Q}} + \sum_{j=1}^4 \frac{I_j B}{K'_{i,j} K_{i,B}}} \quad (S1)$$

$$theK_{catf} = \frac{1.662k_{catf}}{\left( 1 + \frac{10^{-pH}}{10^{-7.02}} + \frac{10^{-9.55}}{10^{-pH}} \right)} \quad (S2)$$

$$theK_{catr} = \frac{1.662k_{catr}}{\left( 1 + \frac{10^{-pH}}{10^{-7.02}} + \frac{10^{-9.55}}{10^{-pH}} \right)} \quad (S3)$$

Symbols: A, MgATP; B, GLC; P, G6P; Q, MgADP; I, Pi, 2,3-BPG and GDP

| Parameter                      | Value    |
|--------------------------------|----------|
| $e_t$ (M)                      | 2.50E-08 |
| $K_{m,MgADP}, K_{i,MgADP}$ (M) | 1.00E-03 |
| $K_{m,MgATP}, K_{i,MgATP}$ (M) | 1.00E-03 |
| $K'_{i,2,3BPG}$ (M)            | 2.70E-03 |
| $K'_{i,GSH}$ (M)               | 3.00E-03 |
| $K'_{i,GDP}$ (M)               | 1.00E-05 |
| $K'_{i,G6P}$ (M)               | 1.00E-05 |
| $K_{i,GLC}$ (M)                | 4.70E-05 |
| $K_{m,G6P}, K_{i,G6P}$ (M)     | 4.70E-05 |
| $k_{catf}$ (s <sup>-1</sup> )  | 180      |
| $k_{catr}$ (s <sup>-1</sup> )  | 1.16     |

Parameter values were taken from [2] or adjusted by reference to observed data corrected by the literature.

**PGI, TPI, PGM**

$$v = \frac{e_i \left( \frac{k_{catf} A}{K_{m,A}} - \frac{k_{catr} P}{K_{m,P}} \right)}{1 + \frac{A}{K_{m,A}} + \frac{P}{K_{m,P}}} \quad (S4)$$

Symbols: (PGI) A, G6P; P, F6P (TPI) A, DHAP; P, GA3P (PGM) A, 3PG; P, 2PG

| Parameter                     | Value    |
|-------------------------------|----------|
| PGI                           |          |
| $e_i$ (M)                     | 2.18E-07 |
| $K_{m,G6P}$ (M)               | 1.81E-04 |
| $K_{m,F6P}$ (M)               | 7.10E-05 |
| $k_{catf}$ (s <sup>-1</sup> ) | 1470     |
| $k_{catr}$ (s <sup>-1</sup> ) | 1760     |
| PGM                           |          |
| $e_i$ (M)                     | 4.10E-07 |
| $K_{m,2PG}$ (M)               | 4.60E-05 |
| $K_{m,3PG}$ (M)               | 1.68E-04 |
| $k_{catf}$ (s <sup>-1</sup> ) | 795      |
| $k_{catr}$ (s <sup>-1</sup> ) | 714      |
| TPI                           |          |
| $e_i$ (M)                     | 1.14E-06 |
| $K_{m,DHAP}$ (M)              | 1.62E-04 |
| $K_{m,GA3P}$ (M)              | 4.46E-04 |
| $k_{catf}$ (s <sup>-1</sup> ) | 1280     |
| $k_{catr}$ (s <sup>-1</sup> ) | 14560    |

Parameter values were taken from [2] or adjusted by reference to observed data corrected by the literature.

**PFK**

$$v = \frac{e_i \left( \frac{k_{catf} AB}{K_{mR,A} K_{mR,B}} - \frac{k_{catr} PQ}{K_{mR,P} K_{mR,Q}} \right)}{1 + \frac{A}{K_{mR,A}} + \frac{B}{K_{mR,B}} + \frac{AB}{K_{mR,A} K_{mR,B}} + \frac{P}{K_{mR,P}} + \frac{Q}{K_{mR,Q}} + \frac{PQ}{K_{mR,P} K_{mR,Q}}} \times \rho \quad (S5)$$

$$\rho = \frac{1}{1 + L_{PFK}} \quad (S6)$$

$$L_{PFK} = \frac{\left( \frac{10^{-pH}}{K_a} \right)^n \left( 1 + \frac{ATP}{K_{T,ATP}} \right)^4 \left( 1 + \frac{Mg^{2+}}{K_{T,Mg^{2+}}} \right)^4 \left( 1 + \frac{2,3BPG}{K_{T,2,3BPG}} \right)^4}{\left( 1 + \frac{F6P}{K_{mR,F6P}} + \frac{F16BP}{K_{mR,F16BP}} \right)^4 \left( 1 + \frac{AMP}{K_{R,AMP}} \right)^4 \left( 1 + \frac{Pi}{K_{R,Pi}} \right)^4 \left( 1 + \frac{GDP}{K_{R,GDP}} \right)^4} \quad (S7)$$

Symbols: A, MgATP; B, F6P; P, F1,6BP; Q, MgADP

| Parameter                     | Value    |
|-------------------------------|----------|
| $e_i$ (M)                     | 1.10E-07 |
| $K_{R,AMP}$ (M)               | 3.50E-05 |
| $K_{R,GDP}$ (M)               | 1.51E-05 |
| $K_{R,Pi}$ (M)                | 4.31E-04 |
| $K_{T,ATP}$ (M)               | 9.80E-06 |
| $K_{T,2,3BPG}$ (M)            | 1.44E-03 |
| $K_{T,Mg^{2+}}$ (M)           | 4.40E-04 |
| $K_{mR,F1,6BP}$ (M)           | 4.20E-04 |
| $K_{mR,F6P}$ (M)              | 2.70E-04 |
| $K_{mR,MgADP}$ (M)            | 5.40E-04 |
| $K_{mR,MgATP}$ (M)            | 6.80E-05 |
| $n$                           | 2        |
| $K_a$                         | 8.91E-08 |
| $k_{catf}$ (s <sup>-1</sup> ) | 822      |
| $k_{catr}$ (s <sup>-1</sup> ) | 36       |

Parameter values were taken from [2] or adjusted by reference to observed data corrected by the literature.

**ALD**

$$v = \frac{e_i \left( \frac{k_{catf} A}{K_{m,A}} - \frac{k_{catr} PQ}{K_{i,Q} K_{m,P}} \right)}{1 + \frac{I}{K_{i,I}} + \frac{A}{K_{m,A}} + \frac{K_{m,A} P}{K_{m,P} K_{i,Q}} + \left( 1 + \frac{I}{K_{i,I}} \right) + \frac{Q}{K_{i,Q}} + \frac{K_{m,Q} AP}{K_{i,A} K_{m,P} K_{i,Q}} + \frac{PQ}{K_{i,Q} K_{m,P}}} \quad (S8)$$

Symbols: A, F1,6BP; P, GA3P; Q, DHAP; I, 2,3BPG

| Parameter                     | Value    |
|-------------------------------|----------|
| $e_i$ (M)                     | 3.70E-07 |
| $K_{m,F1,6BP}$ (M)            | 1.65E-05 |
| $K_{i,F1,6BP}$ (M)            | 1.98E-05 |
| $K_{m,DHAP}$ (M)              | 3.50E-05 |
| $K_{i,DHAP}$ (M)              | 1.10E-05 |
| $K_{m,GA3P}$ (M)              | 1.90E-04 |
| $K_{i,2,3BPG}$ (M)            | 1.50E-03 |
| $k_{catf}$ (s <sup>-1</sup> ) | 68       |
| $k_{catr}$ (s <sup>-1</sup> ) | 234      |

Parameter values were taken from [2] or adjusted by reference to observed data corrected by the literature.

**GAPDH**

$$v = \frac{e_i \left( \frac{k_{catf} ABC}{K_{m,A} K_{i,B} K_{i,C}} - \frac{10^{-pH} k_{catr} PQH}{10^{-7.2} K_{i,P} K_{m,Q}} \right)}{GAPDH_{rd}} \quad (S9)$$

$$GAPDH_{rd} = \frac{C}{K_{i,C}} \left( 1 + \frac{C}{K'_{i,C}} \right) + \frac{P}{K_{i,P}} \left( 1 + \frac{C}{K'_{i,C}} \right) + \frac{10^{-pH} K_{m,P} Q}{10^{-7.2} K_{i,P} K_{m,Q}} + \frac{K_{m,C} AB}{K_{m,A} K_{i,B} K_{i,C}} + \frac{AC}{K_{i,A} K_{i,C}} + \frac{BC}{K_{i,B} K_{i,C}} \left( 1 + \frac{C}{K'_{i,C}} \right) + \frac{AP}{K_{i,A} K_{i,P}} + \frac{10^{-pH} K_{m,P} BQ}{10^{-7.2} K_{i,B} K_{i,P} K_{m,Q}} + \frac{10^{-pH} CQ}{10^{-7.2} K_{i,C} K_{i,Q}} + \frac{10^{-pH} PQ}{10^{-7.2} K_{i,P} K_{m,Q}} + \frac{ABC}{K_{m,A} K_{i,B} K_{i,C}} + \frac{K_{m,C} ABP}{K_{i,C} K_{m,A} K_{i,B} K'_{i,P}} + \frac{10^{-pH} BCQ}{10^{-7.2} K_{i,B} K_{i,C} K_{i,Q}} + \frac{10^{-pH} K_{m,P} BPQ}{10^{-7.2} K_{i,P} K_{m,Q} K_{i,B} K'_{i,P}} \quad (S10)$$

Symbols: A, NAD<sup>+</sup>; B, Pi; C, GA3P; P, 1,3BPG; Q, NADH

Supporting Information (Nishino *et al.*)  
Text S1.

| Parameter                     | Value    |
|-------------------------------|----------|
| $e_i$ (M)                     | 7.66E-06 |
| $K_{m,NAD^+}$ (M)             | 4.50E-05 |
| $K_{i,NAD^+}$ (M)             | 4.50E-05 |
| $K_{m,1.3BPG}$ (M)            | 3.30E-06 |
| $K_{i,GA3P}$ (M)              | 6.50E-02 |
| $K_{i,1.3BPG}$ (M)            | 1.00E-02 |
| $K_{m,Pi}$ (M)                | 3.16E-03 |
| $K_{i,Pi}$ (M)                | 3.16E-03 |
| $K_{m,GA3P}$ (M)              | 9.50E-05 |
| $K'_{i,GA3P}$ (M)             | 3.10E-05 |
| $K_{i,NADH}$ (M)              | 1.00E-05 |
| $K'_{i,1.3BPG}$ (M)           | 1.00E-06 |
| $K_{m,NADH}$ (M)              | 3.30E-06 |
| $k_{catf}$ (s <sup>-1</sup> ) | 232      |
| $k_{catr}$ (s <sup>-1</sup> ) | 2765     |

Parameter values were taken from [2] or adjusted by reference to observed data corrected by the literature.

**PGK**

$$v = \frac{e_i \left( \frac{k_{catf} AB}{K_{m,A} K_{i,B}} - \frac{k_{catr} PQ}{K_{i,Q} K_{m,P}} \right)}{1 + \frac{A}{K_{i,A}} + \frac{B}{K_{i,B}} + \frac{AB}{K_{i,B} K_{m,A}} + \frac{P}{K_{i,P}} + \frac{Q}{K_{i,Q}} + \frac{PQ}{K_{i,Q} K_{m,P}}} \quad (S11)$$

Symbols: A, 1,3BPG; B, MgADP; P, 3PG; Q, MgATP

| Parameter                     | Value    |
|-------------------------------|----------|
| $e_i$ (M)                     | 2.74E-06 |
| $K_{i,1.3-BPG}$ (M)           | 1.60E-06 |
| $K_{i,MgADP}$ (M)             | 8.00E-05 |
| $K_{i,MgATP}$ (M)             | 1.30E-04 |
| $K_{i,3PG}$ (M)               | 2.05E-04 |
| $K_{m,1.3-BPG}$ (M)           | 2.00E-06 |
| $K_{m,3PG}$ (M)               | 1.1E-03  |
| $k_{catf}$ (s <sup>-1</sup> ) | 2290     |
| $k_{catr}$ (s <sup>-1</sup> ) | 917      |

Parameter values were taken from [2] or adjusted by reference to observed data corrected by the literature.

Supporting Information (Nishino *et al.*)  
Text S1.

EN

$$v = \frac{e_i \left( \frac{k_{catf} AB}{K_{m,A} K_{i,B}} - \frac{k_{catr} PQ}{K_{i,Q} K_{m,P}} \right)}{1 + \frac{A}{K_{i,A}} + \frac{B}{K_{i,B}} + \frac{AB}{K_{i,B} K_{m,A}} + \frac{Q}{K_{i,Q}} + \frac{PQ}{K_{i,Q} K_{m,P}}} \quad (S12)$$

Symbols: A, 2PG; B, Mg<sup>2+</sup>; P, Mg<sup>2+</sup>; Q, PEP

| Parameter                     | Value    |
|-------------------------------|----------|
| $e_i$ (M)                     | 2.20E-07 |
| $K_{i,Mg^{2+}}$ (M)           | 4.60E-04 |
| $K_{i,PEP}$ (M)               | 3.10E-04 |
| $K_{i,2PG}$ (M)               | 1.40E-04 |
| $K_{m,Mg^{2+}}$ (M)           | 4.60E-05 |
| $K_{m,2PG}$ (M)               | 1.40E-04 |
| $k_{catf}$ (s <sup>-1</sup> ) | 190      |
| $k_{catr}$ (s <sup>-1</sup> ) | 50       |

Parameter values were taken from [2] or adjusted by reference to observed data corrected by the literature.

PK

$$v = \frac{e_i \left( \frac{k_{catf} AB}{K_{mR,A} K_{mR,B}} - \frac{k_{catr} PQ}{K_{mR,P} K_{mR,Q}} \right)}{1 + \frac{A}{K_{mR,A}} + \frac{B}{K_{mR,B}} + \frac{AB}{K_{mR,A} K_{mR,B}} + \frac{P}{K_{mR,P}} + \frac{Q}{K_{mR,Q}} + \frac{PQ}{K_{mR,P} K_{mR,Q}}} \times \rho \quad (S13)$$

$$\rho = \frac{1}{1 + L_{PK}} \quad (S14)$$

$$L_{PK} = \frac{\left( \frac{10^{-6.8}}{10^{-pH}} \right) \left( 1 + \frac{ATP}{K_{T,ATP}} \right)^4}{\left( 1 + \frac{PEP}{K_{mR,PEP}} + \frac{PYR}{K_{mR,PYR}} \right)^4 \left( 1 + \frac{F1,6BP}{K_{R,F1,6BP}} + \frac{GDP}{K_{R,GDP}} \right)^4} \quad (S15)$$

Symbols: A, MgADP; B, PEP; P, PYR; Q, MgATP.

Supporting Information (Nishino *et al.*)  
Text S1.

| Parameter                           | Value    |
|-------------------------------------|----------|
| $e_i$ (M)                           | 8.70E-08 |
| $K_{R,F1,6BP}$ (M)                  | 5.00E-06 |
| $K_{R,GDP}$ (M)                     | 1.00E-04 |
| $K_{R,M\rightleftharpoons ADP}$ (M) | 4.74E-04 |
| $K_{R,M\rightleftharpoons ATP}$ (M) | 3.00E-03 |
| $K_{mR,PEP}$ (M)                    | 2.25E-04 |
| $K_{mR,PYR}$ (M)                    | 2.00E-03 |
| $K_{T,ATP}$ (M)                     | 3.39E-03 |
| $k_{catf}$ (s <sup>-1</sup> )       | 1386     |
| $k_{catr}$ (s <sup>-1</sup> )       | 3.26     |

Parameter values were taken from [2] or adjusted by reference to observed data corrected by the literature.

### LDH

$$v = \frac{e_i \left( \frac{k_{catf} AB}{K_{i,A} K_{m,B}} - \frac{k_{catr} PQ}{K_{i,Q} K_{m,P}} \right)}{LDH_{rd}} \quad (S16)$$

$$LDH_{rd} = \left( 1 + \frac{K_{m,A} B}{K_{i,A} K_{m,B}} + \frac{K_{m,Q} P}{K_{m,P} K_{i,Q}} \right) \left( 1 + \frac{B}{K'_{i,B}} \right) + \frac{A}{K_{i,A}} + \frac{Q}{K_{i,Q}} + \frac{AB}{K_{i,A} K_{m,B}} + \frac{K_{m,Q} AP}{K_{i,A} K_{m,P} K_{i,Q}} + \frac{K_{m,A} BQ}{K_{i,A} K_{m,B} K_{i,Q}} + \frac{PQ}{K_{i,Q} K_{m,P}} + \frac{ABP}{K_{i,A} K_{m,B} K_{i,P}} + \frac{BPQ}{K_{i,B} K_{m,P} K_{i,Q}} \quad (S17)$$

Symbols: A, NADH; B, PYR; P, NAD<sup>+</sup>; Q, LAC

Supporting Information (Nishino *et al.*)  
Text S1.

| Parameter                     | Value    |
|-------------------------------|----------|
| $e_i$ (M)                     | 3.43E-06 |
| $K_{m,NADH}$ (M)              | 8.44E-06 |
| $K_{i,NADH}$ (M)              | 2.45E-06 |
| $K_{m,NAD^+}$ (M)             | 1.07E-04 |
| $K_{i,NAD^+}$ (M)             | 5.03E-04 |
| $K_{m,PYR}$ (M)               | 1.37E-04 |
| $K_{i,PYR}$ (M)               | 2.28E-04 |
| $K'_{i,PYR}$ (M)              | 1.01E-04 |
| $K_{m,LAC}$ (M)               | 1.07E-03 |
| $K_{i,LAC}$ (M)               | 7.33E-03 |
| $k_{catf}$ (s <sup>-1</sup> ) | 458      |
| $k_{catr}$ (s <sup>-1</sup> ) | 115      |

Parameter values were taken from [2] or adjusted by reference to observed data corrected by the literature.

**LDHP (NADPH dependent)**

$$v = \frac{e_i \left( \frac{k_{catf} AB}{K_{m,A} K_{m,B}} - \frac{k_{catr} PQ}{K_{m,P} K_{m,Q}} \right)}{1 + \frac{B}{K_{m,B}} + \frac{Q}{K_{m,Q}}} \quad (S18)$$

Symbols: A, NADPH; B, PYR; P, NADP<sup>+</sup>; Q, LAC

| Parameter                                       | Value    |
|-------------------------------------------------|----------|
| $e_i k_{catf} / K_{m,NADPH}$ (s <sup>-1</sup> ) | 3.46E-03 |
| $e_i k_{catr} / K_{m,NADP}$ (s <sup>-1</sup> )  | 5.43E-07 |
| $K_{m,PYR}$ (M)                                 | 4.14E-04 |
| $K_{m,LAC}$ (M)                                 | 4.14E-04 |

Parameter values were taken from [2] or adjusted by reference to observed data corrected by the literature.



Supporting Information (Nishino *et al.*)  
Text S1.

**DPGM, DPGase ( 2,3-BPG shunt )**

DPGM:

$$v = \frac{e_i(N_1AB + N_2AC + N_3AH)}{D_1A + D_2B + D_3C + D_4D + D_5H + D_6AB + D_7AC + D_8AH + D_9BD + D_{10}CD + D_{11}DH} \quad (S19)$$

DPGase:

$$v = \frac{e_i(N_3AH + N_7DH + N_{11}DH)}{D_1A + D_2B + D_3C + D_4D + D_5H + D_6AB + D_7AC + D_8AH + D_9BD + D_{10}CD + D_{11}DH}$$

(S20)

$$\begin{aligned} N_1 &= k_1k_{12}(k_{15} + k_{16})k_3k_4(k_{10} + k_7)k_8 \\ N_2 &= k_1k_{10}k_{12}(k_{15} + k_{16})k_3k_6(k_5 + k_8) \\ N_3 &= k_1k_{14}k_{16}k_3(k_{10}(k_{12}(k_5 + k_8) + k_5k_9) + k_7(k_{11}(k_5 + k_8) + k_{12}(k_5 + k_8) + k_5k_9)) \\ N_4 &= k_{13}k_{14}k_{16}(k_2 + k_3)(k_{11}k_7(k_5 + k_8) + k_5(k_{10} + k_7)k_9) \\ N_5 &= k_1k_{11}(k_{15} + k_{16})k_3k_4k_7k_8 \\ N_6 &= k_1k_{10}(k_{15} + k_{16})k_3k_6(k_{12}(k_5 + k_8) + k_5k_9) \\ N_7 &= k_{11}k_{13}k_{14}k_{16}(k_2 + k_3)k_7(k_5 + k_8) \\ N_8 &= k_{11}k_{13}(k_{15} + k_{16})(k_2 + k_3)k_4k_7k_8 \\ N_9 &= k_{10}k_{13}(k_{15} + k_{16})(k_2 + k_3)k_5k_6k_9 \\ N_{11} &= k_{13}k_{14}k_{16}(k_2 + k_3)k_5(k_{10} + k_7)k_9 \\ D_1 &= k_1(k_{15} + k_{16})k_3(k_{10}(k_{12}(k_5 + k_8) + k_5k_9) + k_7(k_{11}(k_5 + k_8) + k_{12}(k_5 + k_8) + k_5k_9)) \\ D_2 &= k_{12}(k_{15} + k_{16})(k_2 + k_3)k_4(k_{10}k_7)k_8 \\ D_3 &= k_{10}k_{12}(k_{15} + k_{16})(k_2k_3)k_6(k_5 + k_8) \\ D_4 &= k_{13}(k_{15} + k_{16})(k_2 + k_3)(k_{11}k_7(k_5 + k_8) + k_5(k_{10} + k_7)k_9) \\ D_5 &= k_{14}k_{16}(k_2 + k_3)(k_{10}(k_{12}(k_5 + k_8) + k_5k_9) + k_7(k_{11}(k_5 + k_8) + k_{12}(k_5 + k_8) + k_5k_9)) \\ D_6 &= k_1(k_{15} + k_{16})k_4(k_{11}k_3(k_7k_8) + k_{10}(k_{12}(k_3 + k_8) + k_3(k_8 + k_9)) + k_7(k_{12}(k_3 + k_8) + k_3(k_8 + k_9))) \\ D_7 &= k_1(k_{15} + k_{16})k_6(k_3(k_{12}k_5 + k_{12}k_8 + k_{11}(k_5 + k_8) + k_5k_9) + k_{10}(k_{12}(k_5 + k_8) + k_3(k_5 + k_8 + k_9))) \\ D_8 &= k_1k_{14}(k_{16} + k_3)(k_{10}(k_{12}(k_5 + k_8) + k_5k_9) + k_7(k_{11}(k_5 + k_8) + k_{12}(k_5 + k_8) + k_5k_9)) \\ D_9 &= k_{13}(k_{15} + k_{16})(k_2 + k_3)k_4(k_{11}k_3(k_7k_8) + (k_{10} + k_7)(k_8 + k_9)) \\ D_{10} &= k_{13}(k_{15} + k_{16})(k_2 + k_3)k_6(k_{11}(k_5 + k_8) + k_5k_9 + k_{10}(k_5 + k_8 + k_9)) \\ D_{11} &= k_{13}k_{14}(k_2 + k_3)(k_{11}(k_{16} + k_7)(k_5 + k_8) + k_{10}(k_5k_9 + k_{16}(k_5 + k_8 + k_9)) + k_7(k_5k_9 + k_{16}(k_5 + k_8 + k_9))) \end{aligned} \quad (S21-S42)$$

Symbols: A, 1,3-BPG; B, 3PG; C, 2PG; D,2,3-BPG; H, 2PG or Pi

Supporting Information (Nishino *et al.*)  
Text S1.

| Parameter                                   | Value    |
|---------------------------------------------|----------|
| $e_r$ (M)                                   | 4.1E-07  |
| $k_2$ (s <sup>-1</sup> )                    | 400      |
| $k_3$ (s <sup>-1</sup> )                    | 9.9      |
| $k_4$ (M <sup>-1</sup> s <sup>-1</sup> )    | 1.85E+08 |
| $k_5$ (M <sup>-1</sup> s <sup>-1</sup> )    | 1.00E+08 |
| $k_6$ (s <sup>-1</sup> )                    | 1000     |
| $k_7$ (s <sup>-1</sup> )                    | 1000     |
| $k_8$ (s <sup>-1</sup> )                    | 10000    |
| $k_9$ (s <sup>-1</sup> )                    | 0.55     |
| $k_{10}$ (s <sup>-1</sup> )                 | 1979     |
| $k_{11}$ (s <sup>-1</sup> )                 | 0.01     |
| $k_{12}$ (s <sup>-1</sup> )                 | 1000     |
| $k_{13}$ (M <sup>-1</sup> s <sup>-1</sup> ) | 1800000  |
| $k_{14}$ (M <sup>-1</sup> s <sup>-1</sup> ) | 1.00E+09 |
| $k_{15}$ (s <sup>-1</sup> )                 | 610000   |
| $k_{16}$ (s <sup>-1</sup> )                 | 0.19     |

Parameter values were taken from [3].

**PRPPsyn**

$$v = \frac{V_m \left( AB - \frac{PQ}{K_{eq}} \right)}{K_{m,A} B + K_{m,B} A + \frac{K_v K_{m,Q} P}{K_{eq}} + \frac{K_v K_{m,P} Q}{K_{eq}} + AB + K_v P} \quad (\text{S43})$$

Symbols: A, R5P; B, MgATP; P, PRPP; Q, AMP

| Parameter                  | Value    |
|----------------------------|----------|
| $K_{m,AMP}$ (M)            | 2.75E-04 |
| $K_{m,ATP}$ (M)            | 1.70E-04 |
| $K_{ea}$                   | 28.6     |
| $K_{m,PRPP}$ (M)           | 9.00E-05 |
| $K_{m,R5P}$ (M)            | 6.50E-04 |
| $K_v$ (M)                  | 7.50E-04 |
| $V_m$ (M h <sup>-1</sup> ) | 5.54E-04 |

Parameter values were taken from [4].

Supporting Information (Nishino *et al.*)  
Text S1.

**AK**

$$v = \frac{V_m AB}{K_{i,A}K_{m,B} + K_{m,A}B + K_{m,B}A + AB} \quad (\text{S44})$$

Symbols: A, ADO; B, MgATP

| Parameter                  | Value    |
|----------------------------|----------|
| $K_{i,ADO}$ (M)            | 5.40E-07 |
| $K_{m,ADO}$ (M)            | 1.75E-06 |
| $K_{m,MgATP}$ (M)          | 2.70E-05 |
| $V_m$ (M s <sup>-1</sup> ) | 5.50E-07 |

Parameter values were taken from [5] and [6].

**APK**

$$v = \frac{e_t \left( k_{catf} \frac{AB}{K_{m,A}K_{m,B}} - k_{catr} \frac{PQ}{K_{m,P}K_{m,Q}} \right)}{1 + \frac{A}{K_{m,A}} + \frac{B}{K_{m,B}} + \frac{AB}{K_{m,A}K_{m,B}} + \frac{P}{K_{m,P}} + \frac{Q}{K_{m,Q}} + \frac{PQ}{K_{m,P}K_{m,Q}}} \quad (\text{S45})$$

Symbols: A, ADP; B, MgADP; P, AMP; Q, MgATP

| Parameter                     | Value    |
|-------------------------------|----------|
| $e_t$ (M)                     | 9.70E-07 |
| $K_{m,ADP}$ (M)               | 1.00E-05 |
| $K_{m,MgADP}$ (M)             | 1.00E-04 |
| $K_{m,MgATP}$ (M)             | 1.10E-04 |
| $K_{m,AMP}$ (M)               | 6.70E-05 |
| $k_{catf}$ (s <sup>-1</sup> ) | 2080     |
| $k_{catr}$ (s <sup>-1</sup> ) | 3800     |

Parameter values were taken from [2].

Supporting Information (Nishino *et al.*)  
Text S1.

**ATPase, AMPase, IMPase, GSHox, non-glycolytic NADH consumption**

$$v = k S \quad (\text{S46})$$

S: substrate of the reaction

| Parameter              | Value    |
|------------------------|----------|
| AMPase <sup>a</sup>    |          |
| $k$ (h <sup>-1</sup> ) | 1.58     |
| ATPase <sup>c</sup>    |          |
| $k$ (h <sup>-1</sup> ) | 7.12E-01 |
| IMPase <sup>a</sup>    |          |
| $k$ (h <sup>-1</sup> ) | 9.00E-02 |
| GSHox <sup>c</sup>     |          |
| $k$ (s <sup>-1</sup> ) | 2.38E-05 |
| NADHox <sup>b</sup>    |          |
| $k$ (s <sup>-1</sup> ) | 1.63E-02 |

Parameter values were taken from <sup>a</sup>[7], <sup>b</sup>[2] or <sup>c</sup>adjusted to achieve the appropriate steady-state concentration of metabolites.

**ADPRT, HGPRT**

$$v = V_m \left( \frac{A}{1 + K_{m,A}} \right) \left( \frac{B}{1 + K_{m,B}} \right) \quad (\text{S47})$$

Symbols: (ADPRT) A, ADE; B, PRPP (HGPRT) A, PRPP; B, HX

| Parameter                  | Value    |
|----------------------------|----------|
| ADPRT                      |          |
| $K_{m,ADE}$ (M)            | 2.30E-06 |
| $K_{m,PRPP}$ (M)           | 1.95E-05 |
| $V_m$ (M h <sup>-1</sup> ) | 7.80E-05 |
| HGPRT                      |          |
| $K_{m,PRPP}$ (M)           | 5.00E-06 |
| $K_{m,HX}$ (M)             | 2.20E-04 |
| $V_m$ (M h <sup>-1</sup> ) | 2.01E-04 |

Parameter values were taken from [7].

Supporting Information (Nishino *et al.*)  
Text S1.

**PRM, PNPase**

$$v = ka A - kd P \quad (\text{S48})$$

Symbols: (PNPase) A, INO; P, HX. (PRM) A, R1P; P, R5P.

| Parameter               | Value    |
|-------------------------|----------|
| PNPase                  |          |
| $ka$ (s <sup>-1</sup> ) | 1.11E+03 |
| $kd$ (s <sup>-1</sup> ) | 1.00E+02 |
| PRM                     |          |
| $ka$ (s <sup>-1</sup> ) | 7.25     |
| $kd$ (s <sup>-1</sup> ) | 1.00E+02 |

Parameter values were taken from [8].

**PNPase2 (guanosine phosphorylation process)**

$$v = kAB \quad (\text{S49})$$

Symbols: A, GUO; B, Pi

| Parameter                               | Value   |
|-----------------------------------------|---------|
| $k$ (s <sup>-1</sup> •M <sup>-2</sup> ) | 1.0E+08 |

Parameter value was determined by fitting the GUO depletion curve as measured by CE-TOFMS experiments (Figure S1).

**6PGLase, ADA, AMPDA**

$$v = \frac{V_m S}{K_m + S} \quad (\text{S50})$$

S: substrate of the reaction

| Parameter                  | Value    |
|----------------------------|----------|
| 6PGLase <sup>a</sup>       |          |
| $K_m$ (M)                  | 7.99E-05 |
| $V_m$ (M h <sup>-1</sup> ) | 2.2518   |
| ADA <sup>b</sup>           |          |
| $K_m$ (M)                  | 5.20E-05 |
| $V_m$ (M h <sup>-1</sup> ) | 2.00E-02 |
| AMPDA <sup>b</sup>         |          |
| $K_m$ (M)                  | 8.00E-04 |
| $V_m$ (M h <sup>-1</sup> ) | 1.00E-05 |

Parameter values were taken from <sup>a</sup>[4], <sup>b</sup>[7].

Supporting Information (Nishino *et al.*)  
Text S1.

**G6PDH**

$$v = \frac{V_m \frac{AB}{K_{m,A} K_{m,B}}}{1 + \frac{B}{K_{m,B}} \left( 1 + \frac{A}{K_{m,A}} \right) + \frac{P}{K_{m,P}} + \frac{ATP}{K_{ATP}} + \frac{2,3-BPG}{K_{2,3-BPG}}} \quad (S51)$$

Symbols: A, G6P; B, NADP; P, NADPH

| Parameter                  | Value    |
|----------------------------|----------|
| $K_{ATP}$ (M)              | 7.49E-04 |
| $K_{2,3BPG}$ (M)           | 2.29E-03 |
| $K_{m,G6P}$ (M)            | 6.67E-05 |
| $K_{m,NADP}$ (M)           | 3.67E-06 |
| $K_{m,NADPH}$ (M)          | 3.12E-06 |
| $V_m$ (M s <sup>-1</sup> ) | 6.40E-05 |

Parameter values were taken from [9].

**6PGODH**

$$v = \frac{e_i (N_1 AB - N_2 PQ)}{D_1 + D_2 A + D_3 B + D_4 P + D_5 Q + D_6 AB + D_7 AP + D_8 BQ + D_9 PQ + D_{10} ABP + D_{11} BPQ} \quad (S52)$$

$$N_1 = k_1 k_3 k_5 k_7 k_9$$

$$N_2 = k_2 k_4 k_6 k_8 k_{10}$$

$$D_1 = k_2 k_9 (k_4 k_6 + k_5 k_6 + k_5 k_7)$$

$$D_2 = k_1 k_9 (k_4 k_6 + k_5 k_6 + k_5 k_7)$$

$$D_3 = k_3 k_5 k_7 k_9$$

$$D_4 = k_2 k_4 k_6 k_8 \quad (S53-S65)$$

$$D_5 = k_2 k_{10} (k_4 k_6 + k_5 k_6 + k_5 k_7)$$

$$D_6 = k_1 k_3 (k_5 k_7 + k_5 k_9 + k_6 k_9 + k_7 k_9)$$

$$D_7 = k_1 k_4 k_6 k_8$$

$$D_8 = k_3 k_5 k_7 k_{10}$$

$$D_9 = k_8 k_{10} (k_2 k_4 + k_2 k_5 + k_2 k_6 + k_4 k_6)$$

$$D_{10} = k_1 k_3 k_8 (k_5 + k_6)$$

$$D_{11} = k_3 k_8 k_{10} (k_5 + k_6)$$

Symbols: A, NADP; B, GO6P; P, RU5P; Q, NADPH

Supporting Information (Nishino *et al.*)  
Text S1.

| Parameter                                   | Value    |
|---------------------------------------------|----------|
| $e_i$ (M)                                   | 2.10E-06 |
| $k_1$ (M <sup>-1</sup> s <sup>-1</sup> )    | 2.40E+06 |
| $k_2$ (s <sup>-1</sup> )                    | 4.10E+02 |
| $k_3$ (M <sup>-1</sup> s <sup>-1</sup> )    | 2.00E+09 |
| $k_4$ (M <sup>-1</sup> s <sup>-1</sup> )    | 2.60E+04 |
| $k_5$ (s <sup>-1</sup> )                    | 48.0     |
| $k_6$ (s <sup>-1</sup> )                    | 30.0     |
| $k_7$ (s <sup>-1</sup> )                    | 6.30E+02 |
| $k_8$ (M <sup>-1</sup> s <sup>-1</sup> )    | 3.60E+04 |
| $k_9$ (s <sup>-1</sup> )                    | 8.00E+02 |
| $k_{10}$ (M <sup>-1</sup> s <sup>-1</sup> ) | 2.25E+05 |
| $k_{11}$ (s <sup>-1</sup> )                 | 3.00E+02 |
| $k_{12}$ (M <sup>-1</sup> s <sup>-1</sup> ) | 4.95E+06 |

Parameter values were taken from [4].

Supporting Information (Nishino *et al.*)  
Text S1.

**GSSGR**

$$v = \frac{e_t(N_1AB - N_2P^2Q)}{GSSGRrd} \quad (S66)$$

$$\begin{aligned} GSSGR_{rd} = & D_1 + D_2A + D_3B + D_4P + D_5Q + D_6AB + D_7AP \\ & + D_8BQ + D_9P^2 + (D_{10} + D_{11})PQ + (D_{12} + D_{13})ABP + D_{14}AP^2 \\ & + D_{15}BPQ + D_{16}P^2Q + D_{17}ABP^2 + D_{18}BP^2Q \end{aligned} \quad (S67)$$

$$N_1 = k_1k_3k_5k_7k_9k_{11}$$

$$N_2 = k_2k_4k_6k_8k_{10}k_{12}$$

$$D_1 = k_2k_9k_{11}(k_4k_6 + k_4k_7 + k_5k_7)$$

$$D_2 = k_1k_9k_{11}(k_4k_6 + k_4k_7 + k_5k_7)$$

$$D_3 = k_3k_5k_7k_9k_{11}$$

$$D_4 = k_2k_4k_6k_8k_{11}$$

$$D_5 = k_2k_9k_{12}(k_4k_6 + k_4k_7 + k_5k_7)$$

$$D_6 = k_1k_3(k_5k_9k_{11} + k_6k_9k_{11} + k_7k_9k_{11} + k_5k_7k_9 + k_5k_7k_{11})$$

$$D_7 = k_1k_4k_6k_8k_{11}$$

$$D_8 = k_3k_5k_7k_9k_{12}$$

$$D_9 = k_2k_4k_6k_8k_{10}$$

$$D_{10} = k_2k_4k_6k_8k_{12}$$

$$D_{11} = k_2k_{10}k_{12}(k_4k_6 + k_4k_7 + k_5k_7)$$

$$D_{12} = k_1k_3k_8k_{11}(k_5 + k_6)$$

$$D_{13} = k_1k_3k_5k_7k_9k_{10}$$

$$D_{14} = k_1k_4k_6k_8k_{10}$$

$$D_{15} = k_3k_5k_7k_{10}k_{12} \quad (S68-S87)$$

$$D_{16} = k_8k_{10}k_{12}(k_2k_4 + k_2k_5 + k_2k_6 + k_4k_6)$$

$$D_{17} = k_1k_3k_8k_{10}(k_5 + k_6)$$

$$D_{18} = k_3k_8k_{10}k_{12}(k_5 + k_6)$$

Symbols: A, NADPH; B, GSSG;P, GSH; Q, NADP



Supporting Information (Nishino *et al.*)  
Text S1.

| Parameter                                   | Value    |
|---------------------------------------------|----------|
| $e_t$ (M)                                   | 1.25E-07 |
| $k_1$ (M <sup>-1</sup> s <sup>-1</sup> )    | 8.50E+07 |
| $k_2$ (s <sup>-1</sup> )                    | 5.10E+02 |
| $k_3$ (M <sup>-1</sup> s <sup>-1</sup> )    | 1.00E+08 |
| $k_4$ (M <sup>-1</sup> s <sup>-1</sup> )    | 5.60E+05 |
| $k_5$ (s <sup>-1</sup> )                    | 8.10E+02 |
| $k_6$ (s <sup>-1</sup> )                    | 1.00E+03 |
| $k_7$ (s <sup>-1</sup> )                    | 1.00E+06 |
| $k_8$ (M <sup>-1</sup> s <sup>-1</sup> )    | 5.00E+07 |
| $k_9$ (s <sup>-1</sup> )                    | 1.00E+06 |
| $k_{10}$ (M <sup>-1</sup> s <sup>-1</sup> ) | 5.00E+07 |
| $k_{11}$ (s <sup>-1</sup> )                 | 7.00E+03 |
| $k_{12}$ (M <sup>-1</sup> s <sup>-1</sup> ) | 1.00E+08 |

Parameter values were taken from [4].

**R5PI, X5PI**

$$v = \frac{e_t \left( \frac{k_3 A}{K_{m,A}} - \frac{k_2 P}{K_{m,P}} \right)}{1 + \frac{A}{K_{m,A}} + \frac{P}{K_{m,P}}} \quad (\text{S88})$$

$$K_{m,A} = \frac{k_2 + k_3}{k_1}, K_{m,P} = \frac{k_2 + k_3}{k_4} \quad (\text{S89})$$

Symbols: (R5PI) A, RU5P; P, R5P. (X5PI) A, RU5P; P, X5P.

| Parameter                                | Value    |
|------------------------------------------|----------|
| R5PI                                     |          |
| $e_t$ (M)                                | 1.42E-05 |
| $k_1$ (M <sup>-1</sup> s <sup>-1</sup> ) | 6.09E+04 |
| $k_2$ (s <sup>-1</sup> )                 | 33.3     |
| $k_3$ (s <sup>-1</sup> )                 | 14.2     |
| $k_4$ (M <sup>-1</sup> s <sup>-1</sup> ) | 2.16E+04 |
| X5PI                                     |          |
| $e_t$ (M)                                | 4.22E-06 |
| $k_1$ (M <sup>-1</sup> s <sup>-1</sup> ) | 3.91E+06 |
| $k_2$ (s <sup>-1</sup> )                 | 4.38E+02 |
| $k_3$ (s <sup>-1</sup> )                 | 3.05E+02 |
| $k_4$ (M <sup>-1</sup> s <sup>-1</sup> ) | 1.49E+06 |

Parameter values were taken from [4].

Supporting Information (Nishino *et al.*)  
Text S1.

**TA, TK1, TK2**

$$v = \frac{e_t (N_1 AB - N_2 PQ)}{D_1 A + D_2 B + D_3 P + D_4 Q + D_5 AB + D_6 PQ + D_7 BQ + D_8 AP} \quad (\text{S90})$$

$$N_1 = k_1 k_3 k_5 k_7$$

$$N_2 = k_2 k_4 k_6 k_8$$

$$D_1 = k_1 k_3 (k_6 + k_7)$$

$$D_2 = k_5 k_7 (k_2 + k_3) \quad (\text{S91-S100})$$

$$D_3 = k_2 k_4 (k_6 + k_7)$$

$$D_4 = k_6 k_8 (k_2 + k_3)$$

$$D_5 = k_1 k_5 (k_3 + k_7)$$

$$D_6 = k_4 k_8 (k_2 + k_6)$$

$$D_7 = k_5 k_8 (k_2 + k_3)$$

$$D_8 = k_1 k_4 (k_6 + k_7)$$

Symbols: (TA) A, S7P; B, GA3P; P, E4P; Q, F6P (TK1) A, X5P; B, R5P; P, GA3P; Q, S7P (TK2) A, X5P; B, E4P; P, GA3P; Q, F6P

Supporting Information (Nishino *et al.*)  
Text S1.

| Parameter                                | Value     |
|------------------------------------------|-----------|
| TA                                       |           |
| $e_i$ (M)                                | 6.90E-07  |
| $k_1$ (M <sup>-1</sup> s <sup>-1</sup> ) | 2.16E+04  |
| $k_2$ (s <sup>-1</sup> )                 | 45.3      |
| $k_3$ (s <sup>-1</sup> )                 | 16.3      |
| $k_4$ (M <sup>-1</sup> s <sup>-1</sup> ) | 3.00E+04  |
| $k_5$ (M <sup>-1</sup> s <sup>-1</sup> ) | 4.90E+05  |
| $k_6$ (s <sup>-1</sup> )                 | 60.0      |
| $k_7$ (s <sup>-1</sup> )                 | 17.0      |
| $k_8$ (M <sup>-1</sup> s <sup>-1</sup> ) | 7.90E+04  |
| TK1                                      |           |
| $e_i$ (M)                                | 3.30E-07  |
| $k_1$ (M <sup>-1</sup> s <sup>-1</sup> ) | 2.16E+05  |
| $k_2$ (s <sup>-1</sup> )                 | 38.0      |
| $k_3$ (s <sup>-1</sup> )                 | 34.0      |
| $k_4$ (M <sup>-1</sup> s <sup>-1</sup> ) | 1.56E+05  |
| $k_5$ (M <sup>-1</sup> s <sup>-1</sup> ) | 3.29E+05  |
| $k_6$ (s <sup>-1</sup> )                 | 1.75E+02  |
| $k_7$ (s <sup>-1</sup> )                 | 40.0      |
| $k_8$ (M <sup>-1</sup> s <sup>-1</sup> ) | 4.48E+04  |
| TK2                                      |           |
| $e_i$ (M)                                | 3.30E-07  |
| $k_1$ (M <sup>-1</sup> s <sup>-1</sup> ) | 2.16E+05  |
| $k_2$ (s <sup>-1</sup> )                 | 38.0      |
| $k_3$ (s <sup>-1</sup> )                 | 34.0      |
| $k_4$ (M <sup>-1</sup> s <sup>-1</sup> ) | 1.56 E+05 |
| $k_5$ (M <sup>-1</sup> s <sup>-1</sup> ) | 2.24E+06  |
| $k_6$ (s <sup>-1</sup> )                 | 1.75E+02  |
| $k_7$ (s <sup>-1</sup> )                 | 40.0      |
| $k_8$ (M <sup>-1</sup> s <sup>-1</sup> ) | 2.13E+04  |

Parameter values were taken from [4].

Supporting Information (Nishino *et al.*)  
Text S1.

**L\_GCS**

$$v = \frac{V_m ABC}{\alpha K_{m,A} K_{m,Glu}^{app} K_{m,C}} \frac{1}{1 + \frac{B}{K_{m,Glu}^{app}} + \frac{BC}{K_{m,Glu}^{app} K_{m,C}} + \frac{AB}{K_{m,A} K_{m,Glu}^{app}} + \frac{ABC}{\alpha K_{m,A} K_{m,Glu}^{app} K_{m,C}}} \quad (S101)$$

$$K_{m,Glu}^{app} = \frac{K_{m,Glu} (1 + GSH)}{K_{i,GSH}} \quad (S102)$$

Symbols: A, MgATP; B, glutamate; C, cysteine

| Parameter                  | Value    |
|----------------------------|----------|
| $K_{i,GSH}$ (M)            | 3.40E-03 |
| $K_{m,MgATP}$ (M)          | 4.00E-04 |
| $K_{m,Glu}$ (M)            | 1.80E-03 |
| $K_{m,C}$ (M)              | 1.00E-04 |
| $V_m$ (M h <sup>-1</sup> ) | 5.00E-02 |
| $\alpha$                   | 0.20     |

Parameter values were taken from [10].

**GSH\_S**

$$v = \frac{V_m ABC}{\alpha K_{m,A} K_{m,B} K_{m,C}} \frac{1}{1 + \frac{A}{K_{m,A}} + \frac{AB}{K_{m,A} K_{m,B}} + \frac{AC}{K_{m,A} K_{m,C}} + \frac{ABC}{\alpha K_{m,A} K_{m,B} K_{m,C}}} \quad (S103)$$

Symbols: A, L\_GC; B, glycine; C, MgATP

| Parameter                  | Value    |
|----------------------------|----------|
| $K_{m,L\_GC}$ (M)          | 9.90E-03 |
| $K_{m,glvcine}$ (M)        | 1.37E-03 |
| $K_{m,MgATP}$ (M)          | 2.30E-03 |
| $V_m$ (M h <sup>-1</sup> ) | 8.84E-02 |
| $\alpha$                   | 2.60     |

Parameter values were taken from [4].

Supporting Information (Nishino *et al.*)  
Text S1.

**GSSGtransport**

$$v = V_m \left( \frac{\text{GSSG}}{\text{GSSG} + K_{m,\text{GSSG}}} \right) \left( \frac{\text{MgATP}}{\text{MgATP} + K_{m,\text{MgATP}}} \right) \quad (\text{S104})$$

| Parameter                  | Value    |
|----------------------------|----------|
| $K_{m,\text{GSSG}}$ (M)    | 1.00E-04 |
| $K_{m,\text{MgATP}}$ (M)   | 6.30E-04 |
| $V_m$ (M h <sup>-1</sup> ) | 1.90E-04 |

Parameter values were taken from [4].

**HXtr**

$$v = P_m \text{HX}_{in} + \frac{V_m \text{HX}_{in}}{\text{HX}_{in} + K_m} - \frac{V_{min} \text{HX}_{ex}}{K_{min} \left( 1 + \frac{\text{ADE}_{ex}}{K_i} \right) + \text{HX}_{ex}} \quad (\text{S105})$$

| Parameter                      | Value    |
|--------------------------------|----------|
| $K_i$ (M) <sup>a</sup>         | 1.20E-05 |
| $K_m$ (M)                      | 4.00E-04 |
| $K_{min}$ (M)                  | 1.80E-04 |
| $P_m$ (h <sup>-1</sup> )       | 37.8     |
| $V_m$ (M h <sup>-1</sup> )     | 0.1516   |
| $V_{min}$ (M h <sup>-1</sup> ) | 0.1008   |

Parameter values were taken from [7] and [11].

**LACtr, PYRtr, Pitr**

$$v = k_0 X_{in} - k_1 X_{ex} \quad \text{where} \quad k_0 = k_1 / K_{eq} \quad (\text{S106})$$

$$K_{eq} = 1 + \frac{10^{p\text{Hi} - p\text{Ka}}}{1 + 10^{p\text{Hi} - p\text{Ka}} r^{-1}} \quad (\text{S107})$$

Calculated using Donnan ratio ( $r$ ) = 0.69,  $p\text{Ka}$  (PYR) = 2.39,  $p\text{Ka}$  (LAC) = 0.00506,  $p\text{Ka}$  (Pi) = 6.75 where Hct = 0.5.

X: LAC, PYR, Pi

Supporting Information (Nishino *et al.*)  
Text S1.

| Parameter                | Value    |
|--------------------------|----------|
| LACtr                    |          |
| $k_0$ (s <sup>-1</sup> ) | 7.33E-03 |
| $k_1$ (s <sup>-1</sup> ) | 5.06E-03 |
| PYRtr                    |          |
| $k_0$ (s <sup>-1</sup> ) | 2.61E-02 |
| $k_1$ (s <sup>-1</sup> ) | 1.80E-02 |
| Pitr                     |          |
| $k_0$ (s <sup>-1</sup> ) | 6.06E-04 |
| $k_1$ (s <sup>-1</sup> ) | 5.60E-04 |

Parameter values were taken from [2].

**INOtr, ADOtr, ADE tr**

$$v = V_m \left( \frac{X_{in}}{K_m + X_{in}} - \frac{X_{ex}}{K_m + X_{ex}} \right) \quad (\text{S108})$$

X: INO, ADO, ADE

| Parameter                  | Value    |
|----------------------------|----------|
| ADEtr                      |          |
| $K_m$ (M)                  | 2.60E-03 |
| $V_m$ (M h <sup>-1</sup> ) | 90.0E-02 |
| ADOtr                      |          |
| $K_m$ (M)                  | 1.20E-04 |
| $V_m$ (M h <sup>-1</sup> ) | 6.12E-02 |
| INOtr                      |          |
| $K_m$ (M)                  | 1.20E-04 |
| $V_m$ (M h <sup>-1</sup> ) | 6.12E-02 |

Parameter values were taken from [7].

Supporting Information (Nishino *et al.*)  
Text S1.

**Na<sup>+</sup>/K<sup>+</sup> pump**

$$v = \frac{\left( \frac{\text{ATP}}{\text{ATP} + K_m} \right) \left( \frac{V_m}{2} \right) \left( (\text{K}^+_{ex})^2 + \frac{B_2 \text{K}^+_{ex} z}{2} \right)}{\text{Pump}_{rd}} \quad (\text{S109})$$

$$\text{Pump}_{rd} = B_1 B_2 + 2B_2 \text{K}^+_{ex} + (\text{K}^+_{ex})^2 + \left( \frac{B_3}{\text{Na}^+_{in}} + 1 \right)^3 \left( B_1 B_2 k_2 k_1 + k_3 k_1 (\text{K}^+_{ex})^2 + B_2 \text{K}^+_{ex} z \right) \quad (\text{S110})$$

| Parameter                  | Value    |
|----------------------------|----------|
| $B_1$ (M)                  | 6.17E-05 |
| $B_2$ (M)                  | 1.33E-04 |
| $B_3$ (M)                  | 6.27E-03 |
| $K_m$ (M)                  | 7.64E-04 |
| $V_m$ (M h <sup>-1</sup> ) | 2.32E-03 |
| $k_2 k_1$                  | 8.20E-03 |
| $k_3 k_1$                  | 5.01E-02 |
| $z$                        | 0.711    |

Parameter values were taken from [7].

**Na<sup>+</sup>, K<sup>+</sup> leak**

$$v = \frac{K_x z \log(r) (X_{ex} - r X_{in})}{r - 1} + \frac{V_m X_{ex}}{(K_m + X_{ex}) - r \frac{X_{in}}{(K_m + r X_{in})}} \quad (\text{S111})$$

X : Na<sup>+</sup>, K<sup>+</sup>

| Parameter                  | Value    |
|----------------------------|----------|
| K <sup>+</sup> Leak        |          |
| $K_m$ (M)                  | 4.00E-03 |
| $K_x$ (M)                  | 6.35E-06 |
| $V_m$ (M h <sup>-1</sup> ) | 3.12E-03 |
| $r$                        | 0.620    |
| $z$                        | 1.00     |
| Na <sup>+</sup> Leak       |          |
| $K_m$ (M)                  | 2.10E-02 |
| $K_x$ (M)                  | 7.06E-06 |
| $V_m$ (M h <sup>-1</sup> ) | 2.82E-03 |
| $r$                        | 0.620    |
| $z$                        | 1.00     |

Parameter values were taken from [7].

### 1-2. Intracellular pH degradation profile of PAGGGM-stored RBCs

The intracellular pH decline in PAGGGM-stored RBC was approximated as eq.(S112) from the estimated pH time-series under 4°C (Figure 2A).

$$\text{pH}(t) = 8.79 \times 10^{-14}t^2 - 6.01 \times 10^{-7}t + 7.62 \quad (\text{S112})$$

### 1-3. Descriptions of binding processes of metabolites to $\text{Mg}^{2+}$ , oxyHb and deoxyHb.

The binding processes between metabolites to  $\text{Mg}^{2+}$  and hemoglobin are also considered in the model. Kinetics and association constants for calculation of these bindings were shown below:

#### Binding of metabolites to hemoglobin

| Binding substrates                | Complex        |
|-----------------------------------|----------------|
| deoxyHb + $\leftrightarrow$       | deoxyHb1,3-BPG |
| deoxyHb + $\leftrightarrow$       | deoxyHb2,3-BPG |
| deoxyHb + fADP $\leftrightarrow$  | deoxyHbADP     |
| deoxyHb + fATP $\leftrightarrow$  | deoxyHbATP     |
| deoxyHb + $\leftrightarrow$       | deoxyHbF-1,6BP |
| deoxyHb + GDP $\leftrightarrow$   | deoxyHbGDP     |
| deoxyHb + $\leftrightarrow$       | deoxyHbMgATP   |
| oxyHb + 1,3-BPG $\leftrightarrow$ | oxyHb1,3-BPG   |
| oxyHb + 2,3-BPG $\leftrightarrow$ | oxyHb2,3-BPG   |
| oxyHb + ADP $\leftrightarrow$     | oxyHbADP       |
| oxyHb + ATP $\leftrightarrow$     | oxyHbATP       |
| oxyHb + MgATP $\leftrightarrow$   | oxyHbMgATP     |

$$v = K'_a AB - K_d P \quad (\text{S113})$$

$$K'_a = \frac{1 + \frac{2n}{10^{-7.2}} + \left(\frac{n}{10^{-7.2}}\right)^2}{1 + \frac{2n}{10^{-\text{pH}}} + \left(\frac{n}{10^{-\text{pH}}}\right)^2} \times K_a \quad (\text{S114})$$

Symbols: A and B, binding substrates; P, complex



Supporting Information (Nishino *et al.*)  
Text S1.

| Parameter      | Value    |
|----------------|----------|
| deoxyHb1,3-BPG |          |
| $K_a$          | 1860000  |
| $K_d$          | 1200     |
| $N$            | 1.00E-06 |
| deoxyHb1,3-BPG |          |
| $K_a$          | 6000000  |
| $K_d$          | 1200     |
| $N$            | 1.00E-06 |
| deoxyHbADP     |          |
| $K_a$          | 1440000  |
| $K_d$          | 1200     |
| $N$            | 1.00E-06 |
| deoxyHbATP     |          |
| $K_a$          | 3120000  |
| $K_d$          | 1200     |
| $N$            | 1.00E-06 |
| deoxyHbF-1,6BP |          |
| $K_a$          | 1212000  |
| $K_d$          | 1200     |
| $N$            | 1.00E-06 |
| deoxyHbGDP     |          |
| $K_a$          | 1212000  |
| $K_d$          | 1200     |
| $N$            | 1.00E-06 |
| deoxyHbMgATP   |          |
| $K_a$          | 168000   |
| $K_d$          | 1200     |
| $N$            | 1.00E-06 |
| oxyHb1,3-BPG   |          |
| $K_a$          | 380000   |
| $K_d$          | 1200     |
| $N$            | 1.00E-06 |
| oxyHb2,3-BPG   |          |
| $K_a$          | 300000   |
| $K_d$          | 1200     |
| $N$            | 1.00E-06 |
| oxyHbADP       |          |
| $K_a$          | 300000   |
| $K_d$          | 1200     |
| $N$            | 1.00E-06 |
| oxyHbATP       |          |
| $K_a$          | 432000   |

Supporting Information (Nishino *et al.*)  
Text S1.

|            |          |
|------------|----------|
| $K_d$      | 1200     |
| $N$        | 1.00E-06 |
| oxyHbMgATP |          |
| $K_a$      | 46800    |
| $K_d$      | 1200     |
| $N$        | 1.00E-06 |

Parameter values were taken from [12].

**Binding of metabolites to  $Mg^{2+}$**

Mg1,3-BPG, Mg2,3-BPG

| Binding substrates                         | Complex   |
|--------------------------------------------|-----------|
| $Mg^{2+} + 1,3\text{-BPG} \leftrightarrow$ | Mg1,3-BPG |
| $Mg^{2+} + 2,3\text{-BPG} \leftrightarrow$ | Mg2,3-BPG |

$$v = K'_a AB - K_d P \quad (\text{S115})$$

$$K'_a = \frac{0.0032K_a(Kmgbpg + 10^{-pH} \times Khbpg \times Kmghbpg)}{1 + (10^{-pH} \times Khbpg) + (10^{-2pH} \times Khbpg \times Kh2bpg) + (K^+ \times Khbpg) + (K^+ \times 10^{-pH} \times Khbpg \times Kkhbpg)} \quad (\text{S116})$$

Symbols: A and B, binding substrates; P, complex

| Parameter | Value     |
|-----------|-----------|
| Mg1,3-BPG |           |
| $K_a$     | 228000    |
| $K_d$     | 1200      |
| $Kh2bpg$  | 4270000   |
| $Khbpg$   | 162000000 |
| $Kkbp$    | 85.1      |
| $Kkhbpg$  | 8.9       |
| $Kmgbpg$  | 7410      |
| $Kmghbpg$ | 513       |
| Mg2,3-BPG |           |
| $K_a$     | 804000    |
| $K_d$     | 1200      |
| $Kh2bpg$  | 4270000   |
| $Khbpg$   | 162000000 |
| $Kkbp$    | 85.1      |
| $Kkhbpg$  | 8.9       |
| $Kmgbpg$  | 7410      |
| $Kmghbpg$ | 513       |

Parameter values were taken from [12].

Supporting Information (Nishino *et al.*)  
Text S1.

MgAMP

| Binding substrates            | Complex                 |
|-------------------------------|-------------------------|
| $\text{Mg}^{2+} + \text{AMP}$ | $\leftrightarrow$ MgAMP |

$$v = K_a AB - K_d P \quad (\text{S117})$$

Symbols: A and B, binding substrates; P, complex

| Parameter | Value |
|-----------|-------|
| $K_a$     | 54054 |
| $K_d$     | 1200  |

Parameter values were taken from [12].

MgADP

| Binding substrates            | Complex                 |
|-------------------------------|-------------------------|
| $\text{Mg}^{2+} + \text{ADP}$ | $\leftrightarrow$ MgADP |

$$v = K'_a AB - K_d P \quad (\text{S118})$$

$$K'_a = \frac{Kmgadp + (10^{-\text{pH}} \times Khadp \times Kmgadp)}{1 + (10^{-\text{pH}} \times Khadp) + (K^+ \times Kkadp)} \times K_a \quad (\text{S119})$$

Symbols: A and B, binding substrates; P, complex

| Parameter | Value   |
|-----------|---------|
| $K_a$     | 1711.2  |
| $K_d$     | 1200    |
| $Khadp$   | 5420000 |
| $Kkadp$   | 4.8     |
| $Kmgadp$  | 3290    |
| $Kmghadp$ | 107     |

Parameter values were taken from [12].

Supporting Information (Nishino *et al.*)  
Text S1.

MgATP

| Binding substrates            | Complex                 |
|-------------------------------|-------------------------|
| $\text{Mg}^{2+} + \text{ATP}$ | $\leftrightarrow$ MgATP |

$$v = K'_a AB - K_d P \quad (\text{S120})$$

$$K'_a = \frac{Kmgadp + (10^{-\text{pH}} \times Khadp \times Kmgadp)}{1 + (10^{-\text{pH}} \times Khadp) + (\text{K}^+ \times Kkadp)} \times K_a \quad (\text{S121})$$

Symbols: A and B, binding substrates; P, complex

| Parameter | Value   |
|-----------|---------|
| $K_a$     | 2620.8  |
| $K_d$     | 1200    |
| $Khatp$   | 9070000 |
| $Kkatp$   | 14.0    |
| $Kmgatp$  | 43200   |
| $Kmghatp$ | 748.0   |

Parameter values were taken from [12].

MgF-1,6BP, MgGDP

| Binding substrates                  | Complex                     |
|-------------------------------------|-----------------------------|
| $\text{Mg}^{2+} + \text{F-1,6-BPG}$ | $\leftrightarrow$ MgF-1,6BP |
| $\text{Mg}^{2+} + \text{GDP}$       | $\leftrightarrow$ MgGDP     |

$$v = K'_{a,A} AB - K_{d,A} P \quad (\text{S122})$$

$$K'_{a,A} = \frac{0.0083 K_{a,A} (Kmg, A + 10^{-\text{pH}} \times Kh, A \times Kmgh, A)}{1 + (10^{-\text{pH}} \times Kh, A) + (10^{-2\text{pH}} \times Kh, A \times Kh2, A) + (\text{K}^+ \times Kh, A) + (\text{K}^+ \times 10^{-\text{pH}} \times Kh, A \times Kkh, A)} \quad (\text{S123})$$

A, B, binding substrates; P, complex, A, *fl6bpg* or *gdp*.

Supporting Information (Nishino *et al.*)  
Text S1.

| Parameter      | Value   |
|----------------|---------|
| MgF-1,6-BP     |         |
| $K_{a,fl6bpq}$ | 480000  |
| $K_{d,fl6bpq}$ | 1200    |
| $Kh2,fl6bpq$   | 1120000 |
| $Kh,fl6bpq$    | 7560000 |
| $Kk,fl6bpq$    | 10.7    |
| $Kkh,fl6bpq$   | 3.3     |
| $Kmg,fl6bpq$   | 363.0   |
| $Kmgh,fl6bpq$  | 89.0    |
| MgGDP          |         |
| $K_{a,gdp}$    | 480000  |
| $K_{d,gdp}$    | 1200    |
| $Kh2,gdp$      | 1120000 |
| $Kh,gdp$       | 7560000 |
| $Kk,gdp$       | 10.7    |
| $Kkh,gdp$      | 3.3     |
| $Kmg,gdp$      | 363.0   |
| $Kmgh,dgp$     | 89.0    |

Parameter values were taken from [12].

### MgPi

| Binding substrates | Complex                |
|--------------------|------------------------|
| $Mg^{2+} + Pi$     | $\leftrightarrow$ MgPi |

$$v = K'_a AB - K_d P \quad (S124)$$

$$K'_a = \frac{10^{-7.2} \times Khpi + 0.15 Kkpi}{1 + (10^{-pH} \times Khpi) + (K^+ \times Kkpi)} \times K_a \quad (S125)$$

A, B, binding substrates; P, complex

| Parameter | Value   |
|-----------|---------|
| $K_a$     | 40800   |
| $K_d$     | 1200    |
| $Khpi$    | 5680000 |
| $Kkpi$    | 3.0     |

Parameter values were taken from [12].

**1-4. Descriptions of Band3 protein mediated interactions between hemoglobin and glycolytic enzymes.**

Reversible binding of some glycolytic enzymes and two allosteric form of hemoglobin to Band3 protein, Kinetics and association constants for calculation of these bindings were shown below:

| Binding proteins |   | Complex       |
|------------------|---|---------------|
| Band3 + ALD      | ↔ | Band3-ALD     |
| Band3 + GAPDH    | ↔ | Band3-GAPDH   |
| Band3 + PFK      | ↔ | Band3-PFK     |
| Band3 + deoxyHb  | ↔ | Band3-deoxyHb |
| Band3 + oxyHb    | ↔ | Band3-oxyHb   |

$$v = K_a AB - K_d P \quad (\text{S126})$$

Symbols: A,B, binding proteins; P, complex

| Parameter                  | Value      |
|----------------------------|------------|
| Band3-ALD <sup>a</sup>     |            |
| $K_a$                      | 1200000000 |
| $K_d$                      | 1200       |
| Band3-GAPDH <sup>a</sup>   |            |
| $K_a$                      | 2400000000 |
| $K_d$                      | 1200       |
| Band3-PFK <sup>b</sup>     |            |
| $K_a$                      | 6000000000 |
| $K_d$                      | 1200       |
| Band3-deoxyHb <sup>c</sup> |            |
| $K_a$                      | 12000000   |
| $K_d$                      | 1200       |
| Band3-oxyHb <sup>c</sup>   |            |
| $K_a$                      | 120000     |
| $K_d$                      | 1200       |

Parameter values were taken from <sup>a</sup>[13], <sup>b</sup>[14], <sup>c</sup>[15].

Supporting Information (Nishino *et al.*)  
Text S1.

***1-5. Initial and steady-state concentrations of all substrates in the model***

Abbreviation of metabolites and enzymes are corresponding to those shown in Table 1 in the main text.

| Substrate       | Concentration(M) |
|-----------------|------------------|
| ADE             | 1.53E-05         |
| ADO             | 4.62E-08         |
| DHAP            | 1.51E-05         |
| E4P             | 4.57E-07         |
| F6P             | 1.94E-05         |
| F1,6-BP         | 5.35E-06         |
| G6P             | 5.96E-05         |
| GA3P            | 3.69E-06         |
| GDP             | 8.77E-05         |
| GL6P            | 5.33E-09         |
| GLC             | 4.75E-02         |
| GO6P            | 4.47E-05         |
| GSH             | 3.27E-03         |
| GSSG            | 4.65E-06         |
| HX              | 1.61E-06         |
| IMP             | 8.06E-06         |
| INO             | 1.45E-07         |
| LAC             | 1.33E-03         |
| L_GC            | 4.22E-07         |
| NAD             | 6.51E-05         |
| NADH            | 2.40E-07         |
| NADP            | 6.47E-08         |
| NADPH           | 6.53E-05         |
| Na <sup>+</sup> | 3.39E-02         |
| K <sup>+</sup>  | 1.33E-01         |
| PEP             | 8.19E-06         |
| PRPP            | 1.41E-06         |
| PYR             | 5.16E-05         |
| Pi              | 1.01E-03         |
| R1P             | 8.08E-05         |
| R5P             | 5.86E-06         |
| RU5P            | 4.93E-06         |
| S7P             | 2.10E-05         |
| X5P             | 8.99E-06         |
| 1,3-BPG         | 2.15E-07         |
| 2PG             | 1.45E-05         |
| 3PG             | 4.77E-05         |

Supporting Information (Nishino *et al.*)  
Text S1.

*Continued from the preceding page*

|                                 |          |
|---------------------------------|----------|
| 2,3-BPG (free)                  | 8.09E-04 |
| 2,3-BPG (total)                 | 3.68E-03 |
| AMP                             | 2.48E-05 |
| ADP                             | 6.28E-05 |
| ATP (free)                      | 5.51E-05 |
| ATP (total)                     | 1.91E-03 |
| glutamate                       | 2.00E-04 |
| glycine                         | 1.80E-04 |
| cycteine                        | 2.00E-07 |
| ADE (extracellular)             | 1.44E-03 |
| GUO (extracellular)             | 1.44E-03 |
| ADO (extracellular)             | 0.00     |
| HX (extracellular)              | 0.00     |
| INO (extracellular)             | 0.00     |
| K <sup>+</sup> (extracellular)  | 0.00     |
| Na <sup>+</sup> (extracellular) | 6.40E-02 |
| LAC (extracellular)             | 0.00     |
| PYR (extracellular)             | 0.00     |
| Pi (extracellular)              | 1.60E-02 |
| Band3 binding region (free)     | 2.71E-06 |
| Band3-ALD complex               | 2.70E-07 |
| Band3-GAPDH complex             | 6.47E-06 |
| Band3-PFK complex               | 1.02E-07 |
| ALD (free)                      | 9.95E-05 |
| GAPDH (free)                    | 1.19E-03 |
| PFK (free)                      | 7.54E-06 |
| Band3-deoxyHb complex           | 1.05E-06 |
| Band3-deoxyHb1,3-BPG complex    | 3.83E-10 |
| Band3-deoxyHb2,3-BPG complex    | 6.81E-06 |
| Band3-deoxyHbADP complex        | 1.13E-07 |
| Band3-deoxyHbATP complex        | 2.30E-07 |
| Band3-deoxyHbF1,6-BP complex    | 6.07E-09 |
| Band3-deoxyHbGDP complex        | 9.95E-08 |
| Band3-deoxyHbMgATP complex      | 2.07E-07 |
| Band3-oxyHb                     | 1.30E-06 |
| Band3-oxyHb1,3-BPG complex      | 9.67E-11 |
| Band3-oxyHb2,3-BPG complex      | 4.21E-07 |
| Band3-oxyHbADP complex          | 2.93E-08 |
| Band3-oxyHbATP complex          | 3.94E-08 |
| Band3-oxyHbF1,6-BP complex      | 0.00     |
| Band3-oxyHbGDP complex          | 0.00     |
| Band3-oxyHbMgATP complex        | 7.15E-08 |
| deoxyHb (free)                  | 3.86E-05 |



Supporting Information (Nishino *et al.*)  
Text S1.

*Continued from the preceding page*

---

|                                   |          |
|-----------------------------------|----------|
| deoxyHb-1,3-BPG complex           | 1.41E-08 |
| deoxyHb-2,3-BPG complex           | 2.51E-04 |
| deoxyHb-ADP complex               | 4.18E-06 |
| deoxyHb-ATP complex               | 8.48E-06 |
| deoxyHb-F1,6-BP complex           | 2.24E-06 |
| deoxyHb-GDP complex               | 3.67E-07 |
| deoxyHb-MgATP complex             | 7.65E-06 |
| oxyHb (free)                      | 4.78E-03 |
| oxyHb-1,3-BPG complex             | 3.57E-07 |
| oxyHb-1,3-BPG complex             | 1.55E-03 |
| oxyHb-ADP complex                 | 1.08E-04 |
| oxyHb-ATP complex                 | 1.45E-04 |
| oxyHb-MgATP complex               | 2.64E-04 |
| Mg <sup>2+</sup> (free)           | 6.03E-04 |
| Mg <sup>2+</sup> -1,3-BPG complex | 2.92E-08 |
| Mg <sup>2+</sup> -2,3-BPG complex | 5.69E-04 |
| Mg <sup>2+</sup> -ADP complex     | 1.30E-04 |
| Mg <sup>2+</sup> -AMP complex     | 9.11E-07 |
| Mg <sup>2+</sup> -ATP complex     | 1.41E-03 |
| Mg <sup>2+</sup> -F1,6-BP complex | 1.48E-06 |
| Mg <sup>2+</sup> -GDP complex     | 2.43E-05 |
| Mg <sup>2+</sup> -Pi complex      | 2.14E-05 |

---

## 2. Parameter settings

In terms of the reaction activities of 3 groups ( $\text{Na}^+/\text{K}^+$  pump activity, purine salvage activities, and all other reaction activities), we used the same parameter values which were estimated by using real-number genetic algorithm in our published paper [16], because those parameters are assumed to be altered only by cold temperature.

In GA analysis, predicted ATP and 2,3-BPG were fit to 8 points time-series (every 7days from 0 to 49 days of storage) of ATP and 2,3-BPG in cold-stored RBCs preserved in commercially available Mannitol-Adenine-Phosphate (MAP) solution [17]. The upper and lower bounds of the three adjustable enzymatic activities were 100% and 0.1% of the original activities, respectively. The population size of each generation was 300 and parameter selection was terminated at 4,000 generations. The evaluation function by using GA analysis as follows;

$$EV = \frac{1}{n} \sum_{i=1}^n \left( \frac{[\text{ATP}_{\text{exp}}]_i - [\text{ATP}_{\text{pred}}]_i}{[\text{ATP}_{\text{pred}}]_i} \right)^2 + \frac{1}{n} \sum_{i=1}^n \left( \frac{[2,3\text{-BPG}_{\text{exp}}]_i - [2,3\text{-BPG}_{\text{pred}}]_i}{[2,3\text{-BPG}_{\text{pred}}]_i} \right)^2 \quad (\text{S127})$$

where EV is the error rate between the predicted and the training data,  $n$  is the number of data points ( $n = 8$ ),  $\text{ATP}_{\text{exp}}$  and  $2,3\text{-BPG}_{\text{exp}}$  represent the reference data [17], and  $\text{ATP}_{\text{pred}}$  and  $2,3\text{-BPG}_{\text{pred}}$  are the predicted values by the model. Each parameter was normalized by its initial concentration at day 0. The reaction activities of 3 groups were estimated as 0.1%, 25.0%, and 3.0% of the values in the basal model (37°C), respectively. These parameters were searched within their feasible ranges which we provided in previous study in [16].

Rate constant of guanosine phosphorylation ( $k = 1.0\text{e}+8 \text{ s}^{-1} \cdot \text{M}^{-2}$ ) was obtained from the manually fitting to the time-series of guanosine measured by CE-TOFMS. The guanosine consumption curve calculated by the model showed good fits to the CE-TOFMS data (Figure S1). Moreover, we performed a simulation analysis to observe an influence of the rate constant of guanosine phosphorylation ( $k$ ) on the dynamic behaviors of metabolic intermediates (Figure S4). In the analysis,  $k$  was varied from  $1\text{e}+6$  to  $1\text{e}+9$  and other conditions were same as PAGGGM-stored RBC model. The dynamic behaviors of some metabolic indicators, ATP and HX, were not sensitive to the guanosine phosphorylation rate. The temporal accumulation of 2,3-BPG and other metabolic intermediates were altered when the rate constant was set in lower value, but not sensitive around the value of  $1\text{e}+8$ . Therefore, we consider that the rate constant

Supporting Information (Nishino *et al.*)  
Text S1.

used in our model can be used to predict the effect of guanosine supply, as well as the effect of the ratio of adenine and guanosine on the metabolic dynamics of cold-stored RBC.

## References

1. Kinoshita A, Tsukada K, Soga T, Hishiki T, Ueno Y, et al. (2007) Roles of hemoglobin Allostery in hypoxia-induced metabolic alterations in erythrocytes: simulation and its verification by metabolome analysis. *J Biol Chem* 282: 10731-10741.
2. Mulquiney PJ, Kuchel PW (1999) Model of 2,3-bisphosphoglycerate metabolism in the human erythrocyte based on detailed enzyme kinetic equations: equations and parameter refinement. *Biochem J* 342 Pt 3: 581-596.
3. Mulquiney PJ, Bubb WA, Kuchel PW (1999) Model of 2,3-bisphosphoglycerate metabolism in the human erythrocyte based on detailed enzyme kinetic equations: in vivo kinetic characterization of 2,3-bisphosphoglycerate synthase/phosphatase using <sup>13</sup>C and <sup>31</sup>P NMR. *Biochem J* 342 Pt 3: 567-580.
4. McIntyre LM, Thorburn DR, Bubb WA, Kuchel PW (1989) Comparison of computer simulations of the F-type and L-type non-oxidative hexose monophosphate shunts with <sup>31</sup>P-NMR experimental data from human erythrocytes. *Eur J Biochem* 180: 399-420.
5. Hawkins CF, Bagnara AS (1987) Adenosine kinase from human erythrocytes: kinetic studies and characterization of adenosine binding sites. *Biochemistry* 26: 1982-1987.
6. Mimouni M, Bontemps F, Van den Berghe G (1994) Kinetic studies of rat liver adenosine kinase. Explanation of exchange reaction between adenosine and AMP. *J Biol Chem* 269: 17820-17825.
7. Joshi A, Palsson BO (1989) Metabolic dynamics in the human red cell. Part I--A comprehensive kinetic model. *J Theor Biol* 141: 515-528.
8. Messana I, Orlando M, Cassiano L, Pennacchietti L, Zuppi C, et al. (1996) Human erythrocyte metabolism is modulated by the O<sub>2</sub>-linked transition of hemoglobin. *FEBS Lett* 390: 25-28.
9. Buckwitz D, Jacobasch G, Kuckelkorn U, Plonka A, Gerth C (1990) Glucose-6-phosphate dehydrogenase from *Plasmodium berghei*: kinetic and electrophoretic characterization. *Exp Parasitol* 70: 264-275.
10. Nakayama Y, Kinoshita A, Tomita M (2005) Dynamic simulation of red blood cell metabolism and its application to the analysis of a pathological condition. *Theor Biol Med Model* 2: 18.
11. Domin BA, Mahony WB, Zimmerman TP (1988) Purine nucleobase transport in

Supporting Information (Nishino *et al.*)  
Text S1.

- human erythrocytes. Reinvestigation with a novel "inhibitor-stop" assay. *J Biol Chem* 263: 9276-9284.
12. Mulquiney PJ, Kuchel PW (2003) *Modelling metabolism with Mathematica*. Boca Raton, FL: CRC Press.
  13. von Ruckmann B, Schubert D (2002) The complex of band 3 protein of the human erythrocyte membrane and glyceraldehyde-3-phosphate dehydrogenase: stoichiometry and competition by aldolase. *Biochim Biophys Acta* 1559: 43-55.
  14. Jenkins JD, Madden DP, Steck TL (1984) Association of phosphofructokinase and aldolase with the membrane of the intact erythrocyte. *J Biol Chem* 259: 9374-9378.
  15. Walder JA, Chatterjee R, Steck TL, Low PS, Musso GF, et al. (1984) The interaction of hemoglobin with the cytoplasmic domain of band 3 of the human erythrocyte membrane. *J Biol Chem* 259: 10238-10246.
  16. Nishino T, Yachie-Kinoshita A, Hirayama A, Soga T, Suematsu M, et al. (2009) In silico modeling and metabolome analysis of long-stored erythrocytes to improve blood storage methods. *J Biotechnol* 144: 212-223.
  17. Shiba M, Mura T, Masuyama T, Nagahashi H, Tayama T, et al. (1991) Preparation and preservation of red blood cell concentrates in MAP solution by quadruple bag system. *Japanese Journal of Transfusion Medicine* 37: 404-410.
